# Supplementary material for: Investigating public awareness, prevailing attitudes and perceptions towards domestic violence and abuse in the United Kingdom: a qualitative study
Source: Springer Nature journal article supplement (doi:10.1186/s12889-022-14426-9), 2022-11-08

# Supplementary File 5: Preliminary codes, initial thematic framework and final categories and subcategories

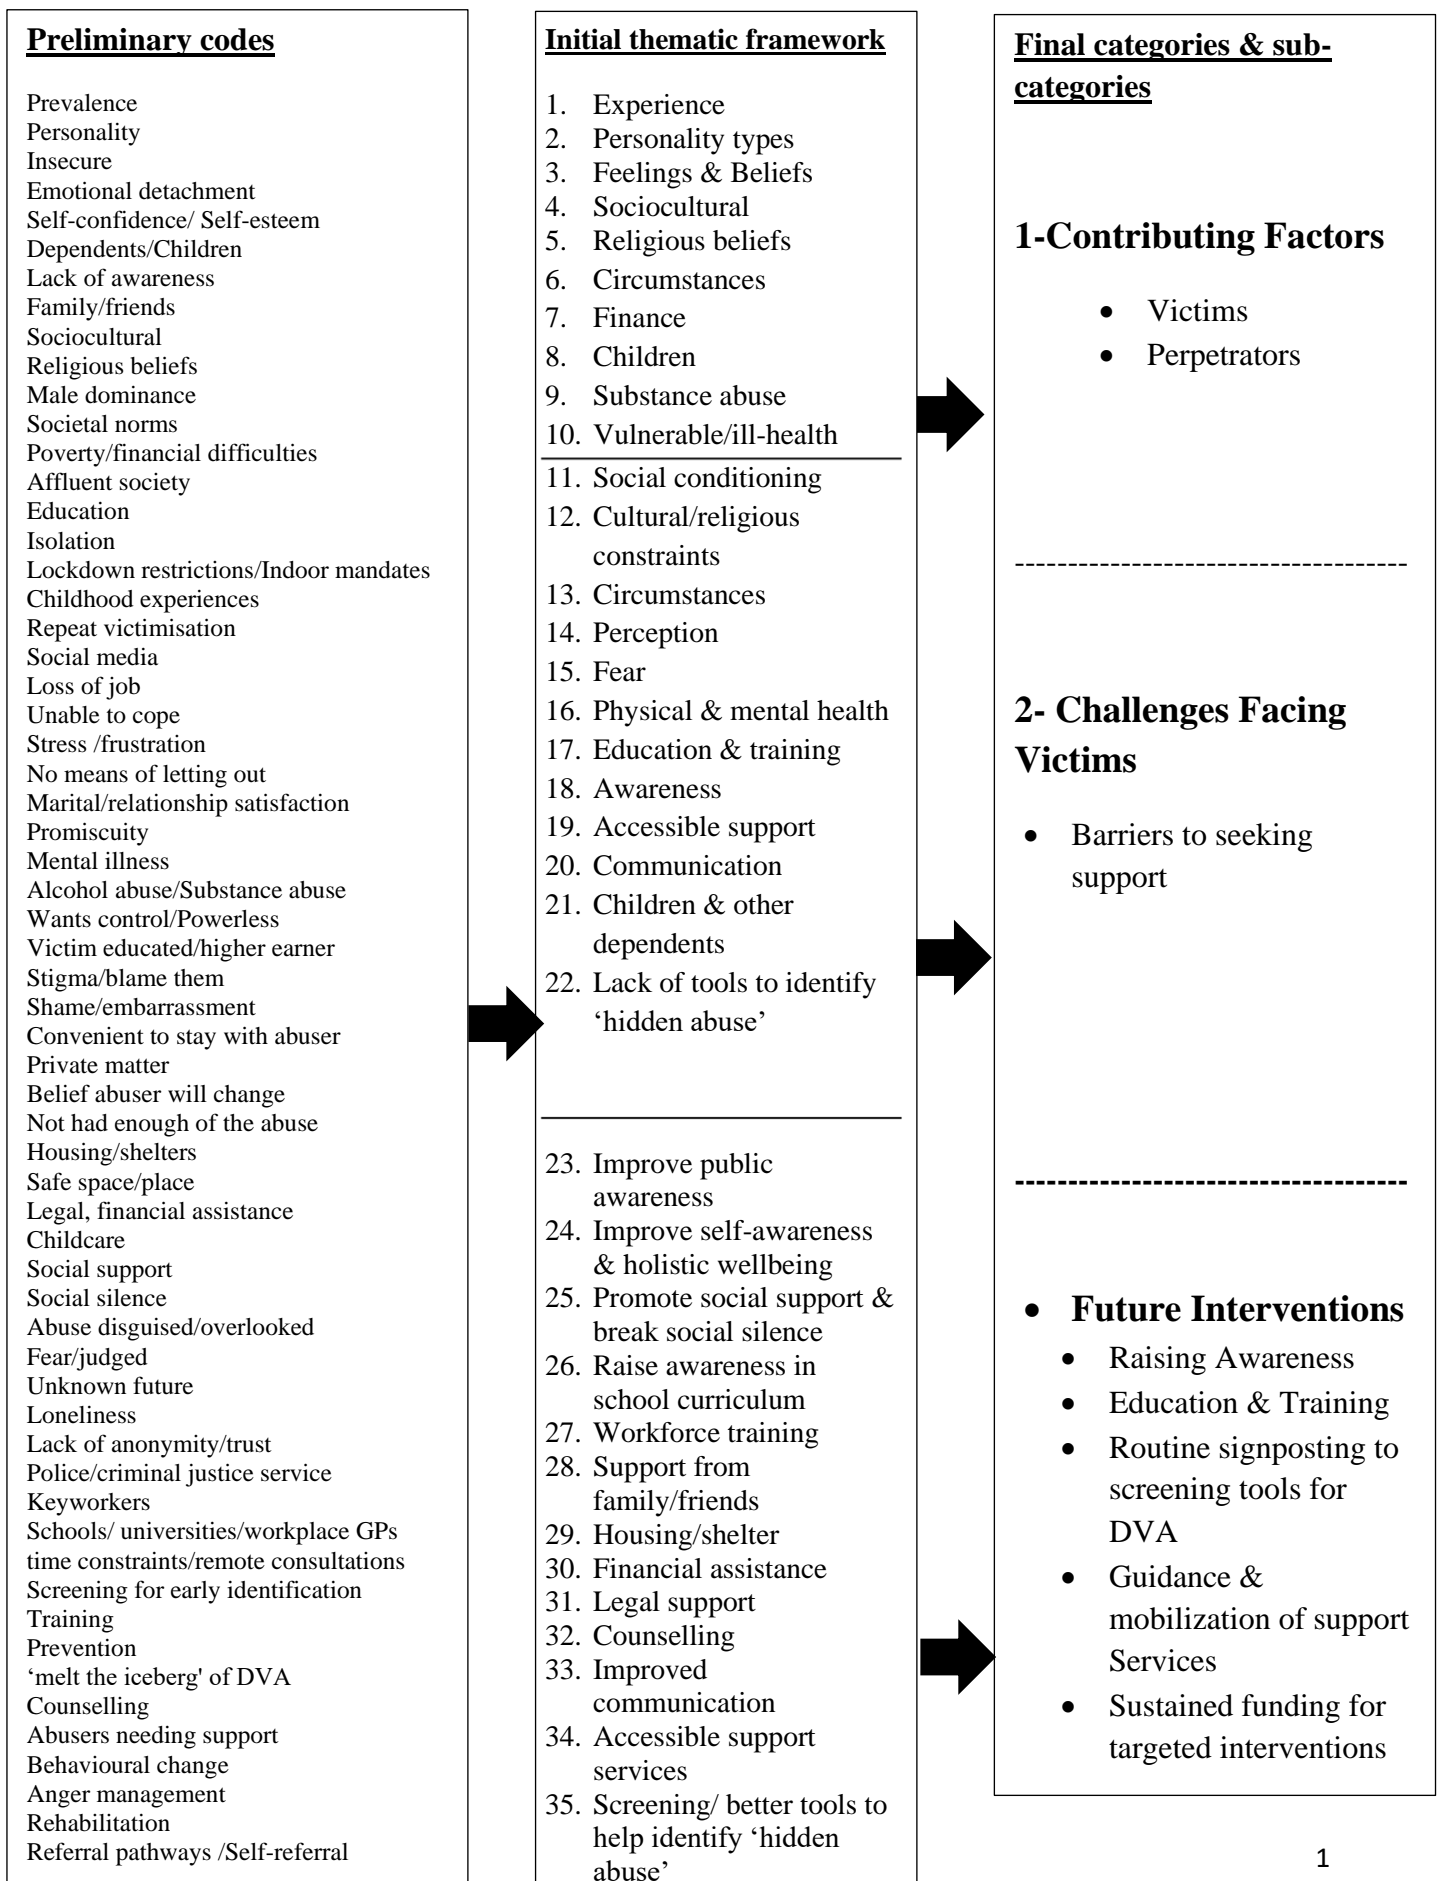

Supplement: MOESM5 [file 23689242]
